# Supplementary material for: Trimetazidine Improves Mitochondrial Dysfunction in SOD1G93A Cellular Models of Amyotrophic Lateral Sclerosis through Autophagy Activation
Source: MDPI journal article supplement (doi:10.3390/ijms25063251), 2024-03-13
Supplement: s1 [file s1]

### Trimetazidine ameliorates mitochondrial dysfunction in Amyotrophic Lateral Sclerosis SOD1<sup>G93A</sup> cell models via autophagy activation.

Illari Salvatori<sup>1,2§</sup>, Valentina Nesci<sup>2,3§</sup>, Alida Spalloni<sup>2</sup>, Veronica Marabitti<sup>4</sup>, Maurizio Muzzi<sup>5</sup>, Henri Zenuni<sup>6</sup>, Silvia Scaricamazza<sup>2</sup>, Marco Rosina<sup>2,3</sup>, Gianmarco Fenili<sup>2</sup>, Mariangela Goglia<sup>6</sup>, Laura Boffa<sup>3</sup>, Roberto Massa<sup>6</sup>, Sandra Moreno<sup>5</sup>, Nicola Biagio Mercuri<sup>2,6</sup>, Francesca Nazio<sup>4</sup>, Patrizia Longone<sup>2</sup>, Cristiana Valle<sup>2,7</sup>, Alberto Ferri<sup>2,7</sup>

<sup>1</sup> University of Roma “La Sapienza”, Department of Experimental Medicine, Rome, Italy

<sup>2</sup> IRCCS, Fondazione Santa Lucia, Rome, Italy

<sup>3</sup> Fondazione PTV Policlinico Tor Vergata, Unit of Neurology, Rome, Italy.

<sup>4</sup> Tor Vergata University of Rome, Department of Biology, Rome, Italy

<sup>5</sup> University of Roma Tre, Department of Science, LIME, Rome, Italy.

<sup>6</sup> Tor Vergata University of Rome, Department of Systems Medicine, Unit of Neurology, Rome, Italy.

<sup>7</sup> National Research Council (CNR), Institute of Translational Pharmacology (IFT), Rome, Italy

§ These authors have equally contributed to this work.

Correspondence to:

 Cristiana Valle, National Research Council, Institute of Translational Pharmacology (IFT), Rome, Italy.

Fax: +39 06 501703323, Tel. +39 06 501703087 Email: [cristiana.valle@cnr.it](mailto:cristiana.valle@cnr.it)

 Alberto Ferri, National Research Council, Institute of Translational Pharmacology (IFT), Rome, Italy.

Fax: +39 06 501703323, Tel. +39 06 501703070 Email: [alberto.ferri@cnr.it](mailto:alberto.ferri@cnr.it)

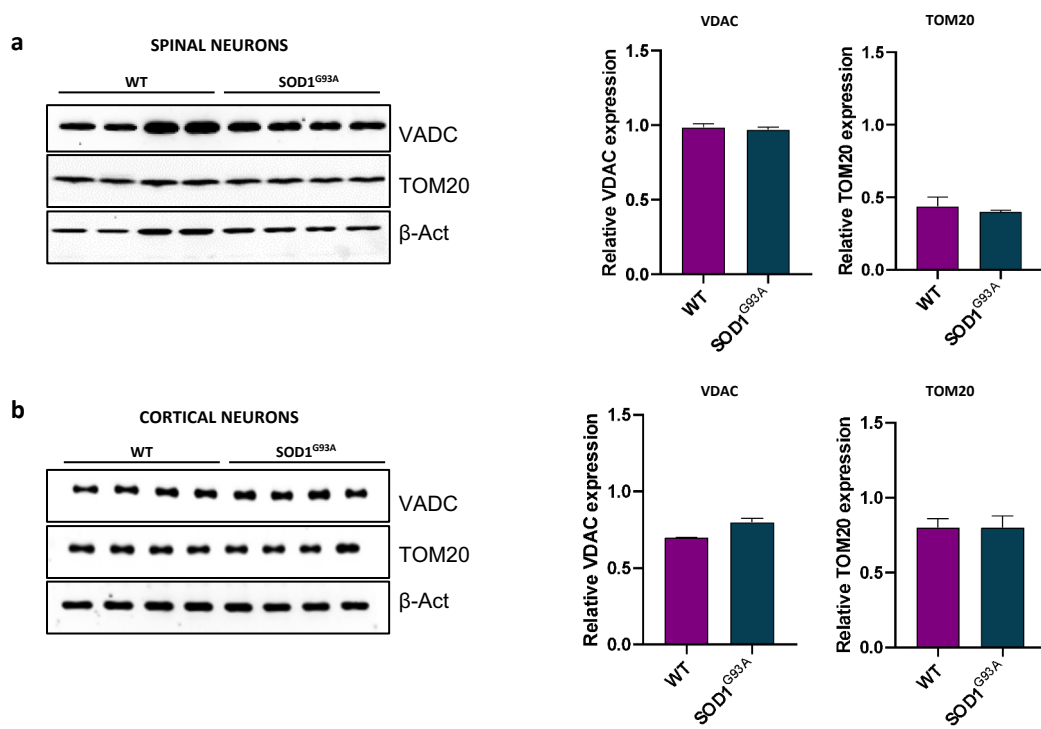

**Fig. S1 (a)** Representative WB (right) and quantification (left) of VADC and TOM20 expression in primary spinal neurons wild-type (WT) and SOD1<sup>G93A</sup> mice. Proteins expression was normalized using β-Actina and represented by arbitrary units. **(b)** Representative WB and quantification as in (a) in primary cortical neurons wild-type (WT) and SOD1<sup>G93A</sup> mice. Data are presented as mean ± SEM. Statistical analysis was conducted using Student's t test.

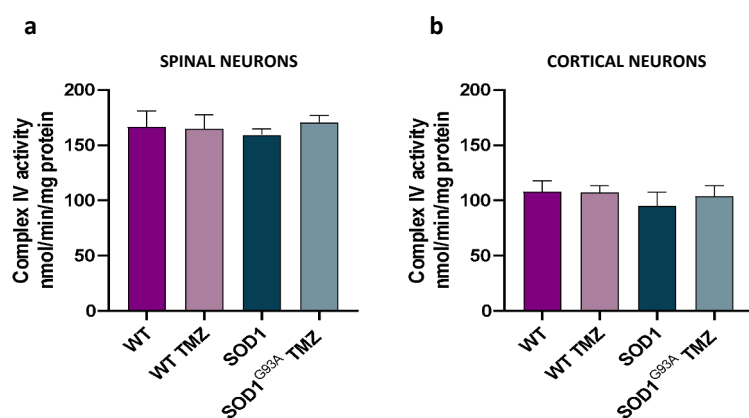

**Fig. S2** Representative histograms showing the activity of electron transport chain complex IV in total extract from primary spinal cord **(a)** and cortical **(b)** cell cultures obtained from WT and SOD1<sup>G93A</sup> mice untreated or treated overnight (ON) with 10 $\mu$ M of Trimetazidine (TMZ). Values are expressed as nmol/min/mg protein, normalised by citrate synthase activity and reported as mean  $\pm$  S.D. from three independent experiments with each sample in quadruplicate.

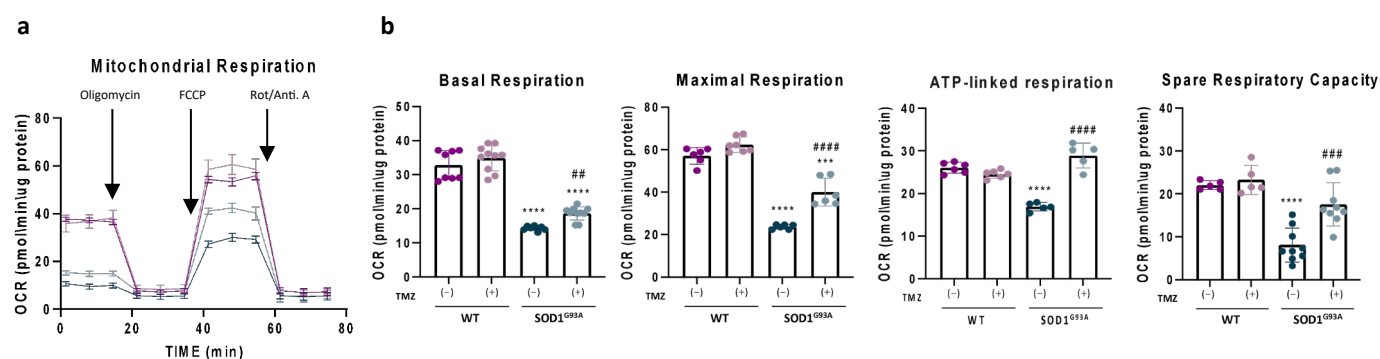

**Fig. S3** Trimetazidine treatment restores mitochondrial performances of NSC-34 SOD1<sup>G93A</sup> cell lines.

**(a)** Representative profile of measurements of the rate of oxygen consumption ratio (OCR) in NSC-34 cell lines constitutively expressing SOD1 wild type (WT) or mutated (SOD1<sup>G93A</sup>), untreated or treated with 10  $\mu$ M TMZ as indicated. **(b)** The histograms show individual parameters for basal respiration, maximal respiration, ATP-linked respiration and spare respiratory capacity, as indicated. Data are presented as means  $\pm$  SEM, \*\*\* $p$  < 0.001, \*\*\*\* $p$  < 0.0001 compared with wild type; ### $p$  < 0.01, #### $p$  < 0.001, ##### $p$  < 0.001 compared with untreated SOD1<sup>G93A</sup>,  $n \geq 3$  per group.  $p$  values were obtained using parametric one-way ANOVA with Bonferroni post hoc test.

**a**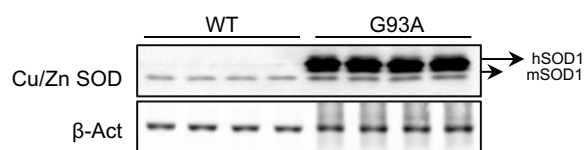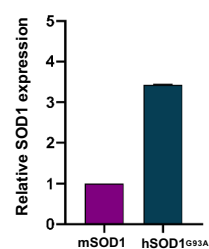**b**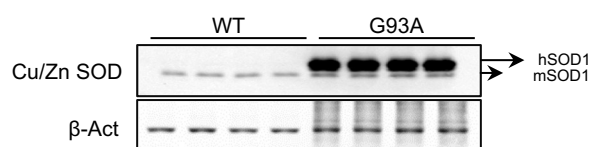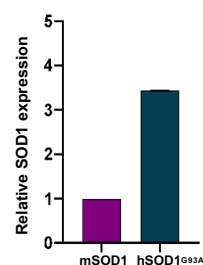

**Fig. S4** Representative WB of murine SOD1 (mSOD1) and human SOD1 (hSOD1) expression in primary spinal **(a)** and cortical **(b)** neurons (left) in wild-type (WT) and SOD1<sup>G93A</sup> (G93A) mice and relative quantification (right) represented by arbitrary units. Data are presented as mean  $\pm$  SEM. \*\*\*\* $p < 0.0001$  compared with mSOD1. P values were obtained using Student's t test.

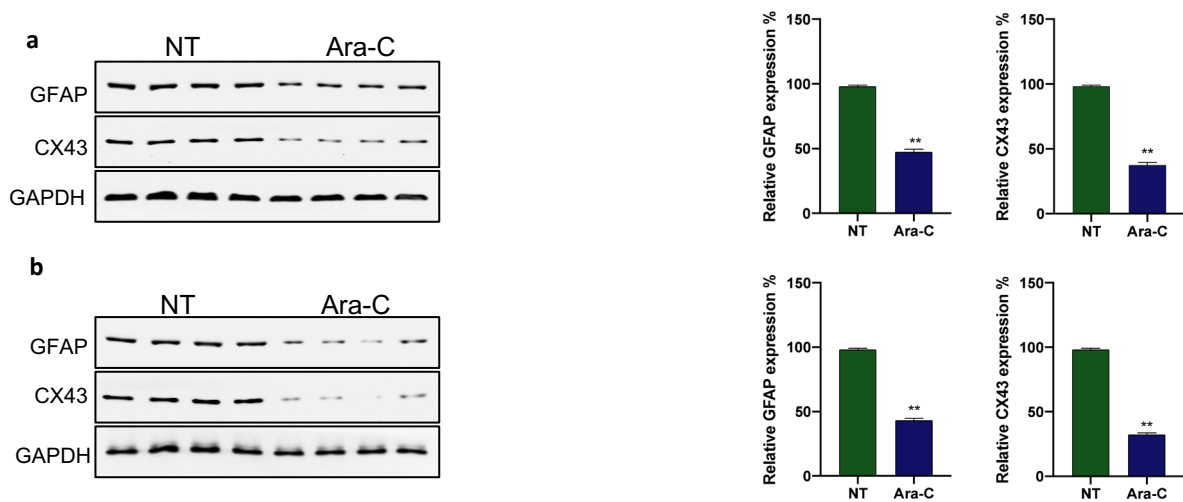

**Fig. S5 (a)** Representative WB (right) and quantification (left) of GFAP and CX43 in primary spinal neurons untreated (NT) and treated with the astroglial proliferation inhibitor (Ara-C). Proteins expression was normalized using GAPDH. **(b)** Representative WB and quantification as in (a) in primary cortical neurons untreated (NT). Data are presented as mean  $\pm$  SEM, \*\* $p < 0.01$  compared with NT. P values were obtained using Student's t test.
